# Supplementary material
Source: PubMed Central journal article supplement (PMC4556235)
Supplement: NIHMS717943-supplement-Supplemental_Tables_1-3.pdf [file NIHMS717943-supplement-Supplemental_Tables_1-3.pdf]

**Supplementary Table 1.** Comparison of clinicopathological features between patients who were sarcopenic alone, sarcopenic/overweight, overweight alone, and neither overweight nor sarcopenic

|                                                      | <b>Normal<br/>N = 27<br/>(10.3%)</b> | <b>Sarcopenic<br/>N = 103<br/>(39.3%)</b> | <b>Obese<br/>N = 58<br/>(22.1%)</b> | <b>Sarcopenic<br/>Obese<br/>N = 74<br/>(28.2%)</b> | <b>All patients<br/>N = 262</b> | <b>p-value</b> |
|------------------------------------------------------|--------------------------------------|-------------------------------------------|-------------------------------------|----------------------------------------------------|---------------------------------|----------------|
| Median Age at Surgery (years; IQR)                   | 61 (54, 76)                          | 72 (66, 79)                               | 68 (60, 74)                         | 72 (67, 78)                                        | 71 (63, 78)                     | 0.01           |
| Sex                                                  |                                      |                                           |                                     |                                                    |                                 |                |
| Female                                               | 14 (51.9%)                           | 17 (16.5%)                                | 4 (6.9%)                            | 2 (2.7%)                                           | 37 (14.1%)                      | <0.0001        |
| Male                                                 | 13 (48.1%)                           | 86 (83.5%)                                | 54 (93.1%)                          | 72 (97.3%)                                         | 225 (85.9%)                     |                |
| Tumor Grade                                          |                                      |                                           |                                     |                                                    |                                 |                |
| Low                                                  | 0 (0%)                               | 9 (8.1%)                                  | 10 (16.7%)                          | 9 (12.2%)                                          | 28 (10.2%)                      | 0.25           |
| High                                                 | 27 (100%)                            | 94 (91.9%)                                | 48 (83.3%)                          | 65 (87.8%)                                         | 234 (89.8%)                     |                |
| Pathologic Tumor Stage                               |                                      |                                           |                                     |                                                    |                                 |                |
| ≤ pT1                                                | 7 (25.9%)                            | 25 (24.3%)                                | 21 (36.2%)                          | 25 (34.2%)                                         | 78 (29.9%)                      | 0.31           |
| pT2                                                  | 7 (25.9%)                            | 27 (26.2%)                                | 12 (20.7%)                          | 19 (26.0%)                                         | 65 (24.9%)                      |                |
| pT3                                                  | 10 (37.0%)                           | 36 (35.0%)                                | 24 (41.4%)                          | 23 (31.5%)                                         | 93 (35.6%)                      |                |
| pT4                                                  | 3 (11.1%)                            | 15 (14.6%)                                | 1 (1.7%)                            | 6 (8.2%)                                           | 25 (9.6%)                       |                |
| pT4                                                  | 3 (11.1%)                            | 15 (14.6%)                                | 1 (1.7%)                            | 6 (8.2%)                                           | 25 (9.6%)                       |                |
| Pathologic N Stage                                   |                                      |                                           |                                     |                                                    |                                 |                |
| N0                                                   | 19 (70.4%)                           | 70 (68.0%)                                | 43 (74.1%)                          | 56 (76.7%)                                         | 188 (72.0%)                     | 0.73           |
| Nx                                                   | 1 (3.7%)                             | 11 (10.7%)                                | 5 (8.6%)                            | 4 (5.5%)                                           | 21 (8.0%)                       |                |
| N1                                                   | 7 (25.9%)                            | 22 (21.4%)                                | 10 (17.2%)                          | 13 (17.8%)                                         | 52 (19.9%)                      |                |
| Pathologic M Stage                                   |                                      |                                           |                                     |                                                    |                                 |                |
| M0                                                   | 3 (11.5%)                            | 9 (8.9%)                                  | 3 (5.3%)                            | 9 (12.5%)                                          | 24 (9.4%)                       | 0.24           |
| M1                                                   | 2 (7.7%)                             | 2 (2.0%)                                  | 0 (0.0%)                            | 1 (1.4%)                                           | 5 (2.0%)                        |                |
| Mx                                                   | 21 (80.8%)                           | 90 (89.1%)                                | 54 (94.7%)                          | 62 (86.1%)                                         | 227 (88.7%)                     |                |
| ASA Score                                            |                                      |                                           |                                     |                                                    |                                 |                |
| ASA 1                                                | 1 (3.7%)                             | 2 (1.9%)                                  | 0 (0.0%)                            | 0 (0.0%)                                           | 3 (1.1%)                        | 0.49           |
| ASA 2                                                | 13 (48.1%)                           | 43 (41.7%)                                | 21 (36.2%)                          | 28 (37.8%)                                         | 105 (40.1%)                     |                |
| ASA 3+                                               | 13 (48.1%)                           | 58 (56.3%)                                | 37 (63.8%)                          | 46 (62.2%)                                         | 154 (58.8%)                     |                |
| ECOG Performance Status <sup>‡</sup>                 |                                      |                                           |                                     |                                                    |                                 |                |
| 0                                                    | 21 (84.0%)                           | 83 (83.0%)                                | 48 (84.2%)                          | 57 (80.3%)                                         | 209 (82.6%)                     | 0.99           |
| 1                                                    | 3 (12.0%)                            | 11 (11.0%)                                | 7 (12.3%)                           | 10 (14.1%)                                         | 31 (12.3%)                      |                |
| ≥ 2                                                  | 1 (4.0%)                             | 6 (6.0%)                                  | 2 (3.5%)                            | 4 (5.6%)                                           | 13 (5.1%)                       |                |
| Mean Albumin (g/dL, SD) <sup>∞</sup>                 | 3.8 (0.7)                            | 3.8 (0.7)                                 | 3.9 (0.6)                           | 3.7 (0.7)                                          | 3.8 (0.7)                       | 0.63           |
| Mean preoperative Hemoglobin (g/dL, SD) <sup>£</sup> | 13.6 (2.3)                           | 13.1 (2.2)                                | 13.9 (1.8)                          | 13.6 (1.8)                                         | 13.4 (2.0)                      | 0.22           |
| Type II Diabetes                                     | 4 (16.0%)                            | 13 (13.1%)                                | 15 (26.8%)                          | 17 (25.8%)                                         | 49 (19.9%)                      | 0.10           |
| Smoking (current/ever)                               | 16 (61.5%)                           | 82 (81.2%)                                | 45 (78.9%)                          | 65 (90.3%)                                         | 208 (81.3%)                     | 0.01           |
| Neoadjuvant Chemotherapy                             | 4 (14.8%)                            | 15 (14.7%)                                | 4 (6.9%)                            | 7 (9.6%)                                           | 30 (11.5%)                      | 0.43           |

<sup>‡</sup> Available in 253 patients

<sup>∞</sup> Available in 122 patients

<sup>£</sup> Available in 242 patients

**Supplementary Table 2.** Anthropomorphic features of patients according body composition

|                                                                            | <b>Normal<br/>N = 27<br/>(10.3%)</b> | <b>Sarcopenic<br/>N = 103<br/>(39.3%)</b> | <b>Obese<br/>N = 58<br/>(22.1%)</b> | <b>Sarcopenic<br/>Obese<br/>N = 74<br/>(28.2%)</b> | <b>All patients<br/>N = 262</b> | <b>p-value</b> |
|----------------------------------------------------------------------------|--------------------------------------|-------------------------------------------|-------------------------------------|----------------------------------------------------|---------------------------------|----------------|
| Median BMI (kg/m);<br>IQR)                                                 | 26.7<br>(24, 28.6)                   | 24.4<br>(22.9, 26.3)                      | 32.7<br>(31.2, 35.4)                | 29.5<br>(27.8, 32.6)                               | 27.7<br>(22.4, 31.1)            | < 0.0001       |
| Median Skeletal<br>Muscle Attenuation<br>(HU; IQR)                         | 38.7<br>(30.9, 46)                   | 35.8<br>(30.8, 42.5)                      | 34.2<br>(26.2, 40.7)                | 29.4<br>(22.5, 37.3)                               | 34.4<br>(27.2, 40.5)            | <0.0001        |
| Median Skeletal<br>Muscle CSA (cm <sup>2</sup> ;<br>IQR)                   | 125.1<br>(114.7, 190.9)              | 138.8<br>(110.7, 154.8)                   | 179.8<br>(168.5, 194.3)             | 143.3<br>(129.8, 155.3)                            | 150.9<br>(127.2, 169.8)         | <0.0001        |
| Median Total Adipose<br>Tissue CSA (cm <sup>2</sup> ; IQR)                 | 298.3<br>(195.5, 372.6)              | 298.8<br>(238.3, 374.1)                   | 589.6<br>(476, 682.9)               | 521.2<br>(454.5, 630.8)                            | 424.2<br>(298.8, 562.5)         | <0.0001        |
| Median Skeletal<br>Muscle Index (cm <sup>2</sup> /m <sup>2</sup> ;<br>IQR) | 51.4<br>(42, 57.1)                   | 44<br>(38.3, 49.5)                        | 58.5<br>(56, 62.5)                  | 47.5<br>(42, 49.8)                                 | 48.5<br>(42, 55.1)              | <0.0001        |
| Median Total Fat Mass<br>(kg; IQR)                                         | 23.7<br>(19.4, 26.8)                 | 23.8<br>(21.2, 26.9)                      | 36<br>(31.2, 39.9)                  | 33.1<br>(30.3, 37.7)                               | 29<br>(23.8, 34.8)              | <0.0001        |
| Median Fat Mass<br>Index (kg/m <sup>2</sup> ; IQR)                         | 8.0<br>(7.2, 9.8)                    | 7.7<br>(6.8, 8.4)                         | 11.6<br>(10.2, 13.6)                | 10.6<br>(9.8, 11.9)                                | 9.5<br>(7.7, 11.3)              | <0.0001        |

Continuous variables are presented as medians (interquartile range). CSA = cross-sectional area (cm<sup>2</sup>)

**Supplementary Table 3.** Subanalysis among nonsarcopenic patients (n=85) assessing the effect of BMI and FMI as continuous variables and of Class I – III obesity by FMI and BMI criteria on all-cause mortality. Of note, among this subcohort, there were a total of 45 deaths from any cause at last follow-up.

| All-Cause Mortality                                                                                                            | HR (95% Confidence Interval) | P-value      |
|--------------------------------------------------------------------------------------------------------------------------------|------------------------------|--------------|
| <b>Model 1: BMI (Categorical)</b>                                                                                              |                              |              |
| Age at Surgery (years) <sup>‡</sup>                                                                                            | 1.04 (1.00 – 1.07)           | 0.03         |
| ASA Score (Ref=ASA1-2)                                                                                                         | 1.42 (0.70 – 2.88)           | 0.33         |
| Tumor Stage at Surgery (Ref= ≤pT2)                                                                                             | 2.38 (1.30 – 4.35)           | 0.33         |
| <b>Obese (BMI criteria, Ref = no)</b>                                                                                          | <b>0.58 (0.32 – 1.07)</b>    | <b>0.08</b>  |
| <b>c-index: 0.693</b>                                                                                                          |                              |              |
| <b>Model 2: FMI (Categorical)</b>                                                                                              |                              |              |
| Age at Surgery (years) <sup>‡</sup>                                                                                            | 1.04 (1.01 – 1.08)           | 0.01         |
| ASA Score (Ref=ASA1-2)                                                                                                         | 1.35 (0.68 – 2.69)           | 0.40         |
| Tumor Stage at Surgery (Ref= ≤pT2)                                                                                             | 2.43 (1.33 – 4.46)           | 0.004        |
| <b>Obese (FMI criteria, Ref = no)</b>                                                                                          | <b>0.53 (0.28 – 1.00)</b>    | <b>0.05</b>  |
| <b>c-index: 0.700</b>                                                                                                          |                              |              |
| All-Cause Mortality                                                                                                            | HR (95% Confidence Interval) | P-value      |
| <b>Model 1: BMI (Continuous)</b>                                                                                               |                              |              |
| Age at Surgery (years) <sup>‡</sup>                                                                                            | 1.03 (1.0 – 1.07)            | 0.07         |
| ASA Score (Ref=ASA1-2)                                                                                                         | 1.61 (0.78 – 3.31)           | 0.20         |
| Tumor Stage at Surgery (Ref= ≤pT2)                                                                                             | 2.44 (1.33 – 4.50)           | 0.004        |
| <b>Body Mass Index (kg/m<sup>2</sup>)<sup>‡</sup></b>                                                                          | <b>0.93 (0.88 – 0.99)</b>    | <b>0.03</b>  |
| <b>c-index: 0.698</b>                                                                                                          |                              |              |
| <b>Model 2: FMI (Continuous)</b>                                                                                               |                              |              |
| Age at Surgery (years) <sup>‡</sup>                                                                                            | 1.04 (1.01 – 1.08)           | 0.01         |
| ASA Score (Ref=ASA1-2)                                                                                                         | 1.66 (0.82 – 3.40)           | 0.16         |
| Tumor Stage at Surgery (Ref= ≤pT2)                                                                                             | 2.32 (1.26 – 4.24)           | 0.007        |
| <b>Fat Mass Index (kg/m<sup>2</sup>)<sup>‡</sup></b>                                                                           | <b>0.86 (0.76 – 0.96)</b>    | <b>0.008</b> |
| <b>c-index: 0.703</b>                                                                                                          |                              |              |
| <sup>‡</sup> Continuous variable: represents the change in hazard ratio for increase of one unit of the variable being tested. |                              |              |
